# Supplementary material for: Myocardial Tissue Characterization in Patients with Hypertensive Crisis, Positive Troponin, and Unobstructed Coronary Arteries: A Cardiovascular Magnetic Resonance-Based Study
Source: MDPI journal article supplement (doi:10.3390/diagnostics13182943), 2023-09-14
Supplement: s1 [file s1]

Table S1: Comparison of cardiac magnetic resonance imaging findings.

| Variable                                | Troponin-negative controls (n=24) | Troponin-positive, unobstructed coronary arteries (n=19) | <i>p</i> |
|-----------------------------------------|-----------------------------------|----------------------------------------------------------|----------|
| Indexed LV EDV (ml/m <sup>2</sup> )     | 65 (59 to 71)                     | 85 (68 to 100)                                           | <0.001   |
| Indexed LV ESV (ml/m <sup>2</sup> )     | 22 (16 to 32)                     | 36 (24 to 70)                                            | 0.005    |
| LV ejection fraction (%)                | 63 ± 12                           | 52 ± 16                                                  | 0.019    |
| Indexed LV mass(g/m <sup>2</sup> )      | 80 (67 to 103)                    | 100 (79 to 133)                                          | 0.017    |
| LV systolic dysfunction, n(%)           | 4(17)                             | 10(53)                                                   | 0.012    |
| Maximum wall thickness (mm)             | 14 ± 2.4                          | 14.5 ± 2                                                 | 0.483    |
| LVH, n (%)                              | 13 (54)                           | 14 (74)                                                  | 0.221    |
| Asymmetric LVH, n (%)                   | 4 (17)                            | 2 (11)                                                   | 0.678    |
| Indexed LA volume (ml/m <sup>2</sup> )  | 30 (28 to 36)                     | 44(32 to 56)                                             | <0.001   |
| Global T2-w SI Ratio                    | 1.4 ± 0.2                         | 1.4 ± 0.1                                                | 0.551    |
| Basal T2-w SI Ratio                     | 1.4 ± 0.2                         | 1.5 ± 0.2                                                | 0.661    |
| Mid-ventricular T2-w SI Ratio           | 1.4 ± 0.2                         | 1.5 ± 0.2                                                | 0.309    |
| Apical T2-w SI Ratio                    | 1.4 ± 0.2                         | 1.4 ± 0.2                                                | 0.984    |
| Global native T1 (ms)                   | 1026 ± 39                         | 1042 ± 40                                                | 0.198    |
| Basal native T1 (ms)                    | 1023 ± 39                         | 1052 ± 38                                                | 0.105    |
| Mid-ventricular native T1 (ms)          | 1024 ± 45                         | 1042 ± 45                                                | 0.214    |
| Apical native T1 (ms)                   | 1019 ± 41                         | 1032 ± 49                                                | 0.374    |
| Global T2 relaxation time (ms)          | 47 ± 2                            | 49 ± 2                                                   | 0.004    |
| Basal T2 relaxation time (ms)           | 47 ± 2                            | 48 ± 2                                                   | 0.029    |
| Mid-ventricular T2 relaxation time (ms) | 48 ± 2                            | 50 ± 3                                                   | 0.003    |
| Apical T2 relaxation time (ms)          | 48 ± 2                            | 49 ± 2                                                   | 0.007    |
| Global ECV (%)                          | 23 ± 3                            | 25 ± 4                                                   | 0.047    |
| Basal ECV (%)                           | 22 ± 4                            | 25 ± 5                                                   | 0.066    |
| Mid-ventricular ECV (%)                 | 22 ± 3                            | 25 ± 4                                                   | 0.008    |
| Apical ECV (%)                          | 24 ± 6                            | 25 ± 4                                                   | 0.460    |
| LGE present, n (%)                      | 12/24 (50)                        | 14/17 (82)                                               | 0.050    |
| Infarct-pattern, n(%)                   | 0(0)                              | 5/17(29)                                                 | -        |
| Non-ischaemic, n(%)                     | 12/24 (50)                        | 9/17(53)                                                 | 0.445    |

*P* value for test of two proportions. hs cTnT, high-sensitive cardiac troponin T; NT-proBNP, N-terminal prohormone of brain natriuretic peptide; LV, left ventricular; LV EDV, left ventricular end diastolic volume; LV ESV, left ventricular end systolic volume; LVH, left ventricular hypertrophy; SI, signal intensity; T2-w, T2-weighted; ECV, extracellular volume; LGE, late gadolinium enhancement.

Table S2: Correlation of high-sensitive cardiac troponin T with imaging biomarkers among the group with troponin-positive unobstructed coronary arteries.

| Variable                                        | Spearman's correlation coefficient | <i>p</i> |
|-------------------------------------------------|------------------------------------|----------|
| Indexed left ventricular EDV, mL/m <sup>2</sup> | -0.096                             | 0.694    |
| Indexed left ventricular mass, g/m <sup>2</sup> | -0.295                             | 0.221    |
| Indexed left atrial volume, mL/m <sup>2</sup>   | 0.030                              | 0.904    |
| Left ventricular ejection fraction, %           | -0.029                             | 0.906    |
| T2-weighted signal intensity ratio              | -0.149                             | 0.541    |
| Global T2 time, ms                              | -0.039                             | 0.875    |
| Global native T1 time, ms                       | -0.070                             | 0.775    |
| Global extracellular volume fraction, %         | -0.229                             | 0.402    |

EDV, end-diastolic volume.

Table S3: Comparison of imaging parameters in troponin-positive unobstructed coronary artery group and delta 20% with the troponin-negative controls.

| Variable                               | Troponin-negative controls (n=24) | Troponin-positive, unobstructed coronary artery with delta 20% (n=15) | <i>p</i> |
|----------------------------------------|-----------------------------------|-----------------------------------------------------------------------|----------|
| Age in years, Mean $\pm$ SD            | 47 $\pm$ 14                       | 58 $\pm$ 11                                                           | 0.015    |
| hs cTnT (ng/L)                         | 11 (6 to 11)                      | 193 (57 to 282)                                                       | <0.001   |
| NT-proBNP (ng/L)                       | 77 (22 to 396)                    | 279 (52 to 981)                                                       | 0.101    |
| Indexed LV EDV (ml/m <sup>2</sup> )    | 65 (59 to 71)                     | 77 (67 to 100)                                                        | 0.003    |
| Indexed LV ESV (ml/m <sup>2</sup> )    | 22 (16 to 32)                     | 36 (24 to 70)                                                         | 0.006    |
| LV ejection fraction (%)               | 63 $\pm$ 12                       | 51 $\pm$ 17                                                           | 0.030    |
| Indexed LV mass(g/m <sup>2</sup> )     | 80 (67 to 103)                    | 98 (79 to 128)                                                        | 0.054    |
| LV systolic dysfunction, n(%)          | 4 (17)                            | 8 (53)                                                                | 0.253    |
| Maximum wall thickness (mm)            | 14 $\pm$ 2.4                      | 15 $\pm$ 2.1                                                          | 0.338    |
| LVH, n (%)                             | 13 (54)                           | 11 (73)                                                               | 0.348    |
| Indexed LA volume (ml/m <sup>2</sup> ) | 30 (28 to 36)                     | 44 (32 to 55)                                                         | <0.001   |
| Global T2-w SI Ratio                   | 1.4 $\pm$ 0.2                     | 1.5 $\pm$ 0.1                                                         | 0.399    |
| Basal T2-w SI Ratio                    | 1.4 $\pm$ 0.2                     | 1.5 $\pm$ 0.2                                                         | 0.383    |
| Mid-ventricular T2-w SI Ratio          | 1.4 $\pm$ 0.2                     | 1.5 $\pm$ 0.2                                                         | 0.163    |
| Apical T2-w SI Ratio                   | 1.4 $\pm$ 0.2                     | 1.4 $\pm$ 0.2                                                         | 0.966    |
| Global native T1 (ms)                  | 1026 $\pm$ 39                     | 1027 $\pm$ 37                                                         | 0.352    |
| Basal native T1 (ms)                   | 1023 $\pm$ 39                     | 1058 $\pm$ 39                                                         | 0.191    |
| Mid-ventricular native T1 (ms)         | 1024 $\pm$ 45                     | 1034 $\pm$ 41                                                         | 0.484    |
| Apical native T1 (ms)                  | 1019 $\pm$ 41                     | 1029 $\pm$ 40                                                         | 0.449    |
| Global T2 (ms)                         | 47 $\pm$ 2                        | 49 $\pm$ 2                                                            | 0.091    |
| Basal T2 (ms)                          | 47 $\pm$ 2                        | 48 $\pm$ 2                                                            | 0.062    |
| Mid-ventricular T2 (ms)                | 48 $\pm$ 2                        | 49 $\pm$ 3                                                            | 0.086    |
| Apical T2 (ms)                         | 48 $\pm$ 2                        | 49 $\pm$ 2                                                            | 0.044    |
| Global ECV (%)                         | 23 $\pm$ 3                        | 26 $\pm$ 4                                                            | 0.086    |
| Basal ECV (%)                          | 22 $\pm$ 4                        | 25 $\pm$ 5                                                            | 0.174    |
| Mid-ventricular ECV (%)                | 22 $\pm$ 3                        | 26 $\pm$ 4                                                            | 0.020    |
| Apical ECV (%)                         | 24 $\pm$ 6                        | 25 $\pm$ 4                                                            | 0.203    |
| LGE present, n (%)                     | 12/24 (50)                        | 13/14 (93)                                                            | 0.008    |
| Infarct-pattern, n(%)                  | 0/24(0)                           | 5/14 (36)                                                             | 0.002    |
| Non-ischaemic, n(%)                    | 12/24 (50)                        | 8/14 (57)                                                             | 0.681    |

SD, standard deviation; hs cTnT, high-sensitive cardiac troponin T; NT-proBNP, N-terminal prohormone of brain natriuretic peptide; LV, left ventricular; EDV, end diastolic volume; ESV, end systolic volume; LVH, left ventricular hypertrophy; LA, left atrial; T2-w, T2-weighted; SI, signal intensity; ECV, extracellular volume; LGE, late gadolinium enhancement.

Table S4: Comparison of imaging parameters and biomarkers among patients with troponin-positive unobstructed coronary artery based on pattern of late gadolinium enhancement.

| Variable                               | Non-ischaemic LGE<br>(n=9) | Infarct-pattern LGE<br>(n=5) | <i>p</i> |
|----------------------------------------|----------------------------|------------------------------|----------|
| Age in years, Mean $\pm$ SD            | 58 $\pm$ 12                | 51 $\pm$ 7                   | 0.298    |
| Male, n(%)                             | 7 (78)                     | 3 (60)                       | 0.579    |
| Creatinine ( $\mu$ mol/L)              | 105 (94 to 110)            | 95 (73 to 111)               | 0.518    |
| LDH (U/L)                              | 253 (211 to 298)           | 286 (213 to 387)             | 0.788    |
| Haemoglobin (g/L)                      | 16 $\pm$ 1.7               | 14 $\pm$ 2.8                 | 0.190    |
| hs cTnT (ng/L)                         | 103 (21 to 211)            | 302 (103 to 510)             | 0.060    |
| NT-proBNP (ng/L)                       | 512 (71 to 1266)           | 113 (42 to 252)              | 0.171    |
| Indexed LV EDV (ml/m <sup>2</sup> )    | 100 (72 to 133)            | 67 (66 to 74)                | 0.019    |
| Indexed LV ESV (ml/m <sup>2</sup> )    | 54 (26 to 79)              | 23 (20 to 27)                | 0.029    |
| LV ejection fraction (%)               | 49 $\pm$ 16                | 67 $\pm$ 6                   | 0.029    |
| Indexed LV mass(g/m <sup>2</sup> )     | 111 (87 to 140)            | 79 (70 to 101)               | 0.083    |
| LV systolic dysfunction, n(%)          | 5(67)                      | 0(0)                         | 0.033    |
| Maximum wall thickness (mm)            | 15 $\pm$ 2.4               | 13.5 $\pm$ 1.6               | 0.083    |
| LVH, n (%)                             | 7 (78)                     | 3 (60)                       | 0.579    |
| Indexed LA volume (ml/m <sup>2</sup> ) | 54 (37 to 57)              | 39 (32 to 46)                | 0.147    |
| Global T2-w SI Ratio                   | 1.4 $\pm$ 0.2              | 1.4 $\pm$ 0.1                | 0.518    |
| Basal T2-w SI Ratio                    | 1.5 $\pm$ 0.2              | 1.4 $\pm$ 0.2                | 0.298    |
| Mid-ventricular T2-w SI Ratio          | 1.5 $\pm$ 0.2              | 1.5 $\pm$ 0.2                | 0.699    |
| Apical T2-w SI Ratio                   | 1.4 $\pm$ 0.2              | 1.4 $\pm$ 0.2                | 0.797    |
| Global native T1 (ms)                  | 1045 $\pm$ 34              | 1048 $\pm$ 52                | 0.898    |
| Basal native T1 (ms)                   | 1052 $\pm$ 34              | 1067 $\pm$ 49                | 0.606    |
| Mid-ventricular native T1 (ms)         | 1046 $\pm$ 39              | 1045 $\pm$ 56                | 0.898    |
| Apical native T1 (ms)                  | 1038 $\pm$ 35              | 1033 $\pm$ 61                | 0.898    |
| Global T2 (ms)                         | 48 $\pm$ 2                 | 50 $\pm$ 2                   | 0.298    |
| Basal T2 (ms)                          | 48 $\pm$ 2                 | 49 $\pm$ 2                   | 0.364    |
| Mid-ventricular T2 (ms)                | 49 $\pm$ 1                 | 51 $\pm$ 4                   | 0.298    |
| Apical T2 (ms)                         | 49 $\pm$ 1                 | 50 $\pm$ 3                   | 0.147    |
| Global ECV (%)*                        | 25 $\pm$ 3                 | 27 $\pm$ 6                   | 0.381    |
| Basal ECV (%)                          | 25 $\pm$ 4                 | 26 $\pm$ 8                   | 1.000    |
| Mid-ventricular ECV (%)                | 25 $\pm$ 3                 | 27 $\pm$ 5                   | 0.714    |
| Apical ECV (%)                         | 24 $\pm$ 2                 | 28 $\pm$ 6                   | 0.381    |

SD, standard deviation; LDH, lactate dehydrogenase; hs cTnT, high-sensitive cardiac troponin T; NT-proBNP, N-terminal prohormone of brain natriuretic peptide; LV, left ventricular; EDV, end diastolic volume; ESV, end systolic volume; LVH, left ventricular hypertrophy; LA, left atrial; T2-w, T2-weighted; SI, signal intensity; ECV, extracellular volume; LGE, late gadolinium enhancement.

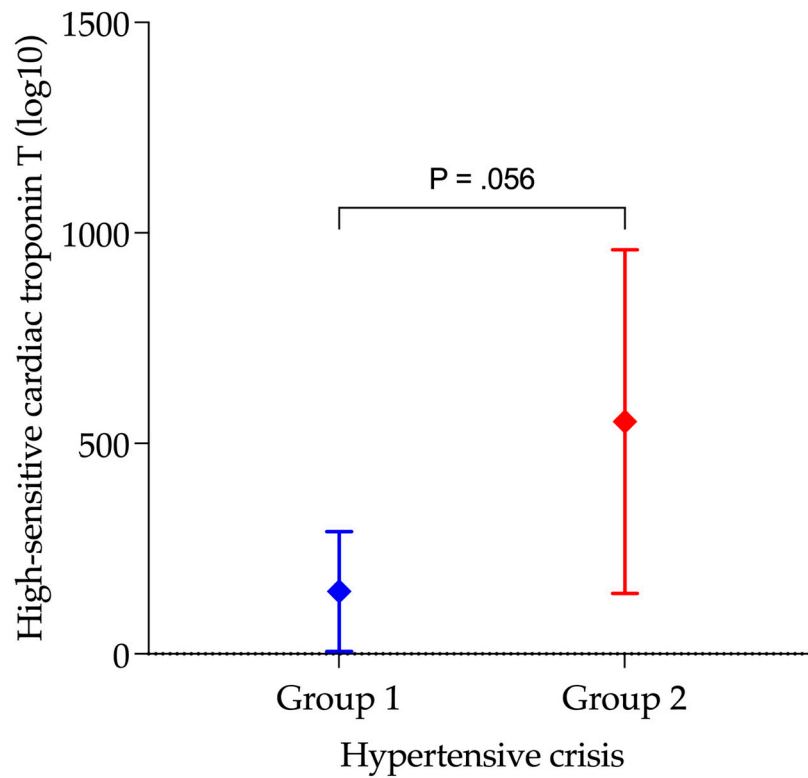

Figure S1: Comparison of cardiac troponin levels in patients with hypertensive crisis and troponin-positive unobstructed coronary arteries. Group 1, No infarct-pattern late gadolinium enhancement; Group 2, Infarct-pattern late gadolinium enhancement.
